# Supplementary material for: Cryptic species obscure introduction pathway of the blue Caribbean sponge (Haliclona (Soestella) caerulea), (order: Haplosclerida) to Palmyra Atoll, Central Pacific
Source: PeerJ. 2015 Aug 6;3:e1170. doi: 10.7717/peerj.1170 (PMC4558080; doi:10.7717/peerj.1170)
Supplement: Appendix S1 — GenBank Accession numbers of cf. Haliclona caerulea sequences for all loci: CO1, CO1 ext., rnl and 18s, included in this study. [file peerj-03-1170-s001.xlsx]

## Sheet: GenBank Accession Numbers_Knapp
Sequence_ID	Genbank Accession Number
Caribbean_PR_1_cf.Haliclona.caerulea_CO1	KT253772
Caribbean_PR_2_cf.Haliclona.caerulea_CO1	KT253773
Caribbean_PR_3_cf.Haliclona.caerulea_CO1	KT253774
Caribbean_PR_4_cf.Haliclona.caerulea_CO1	KT253775
Caribbean_PR_5_cf.Haliclona.caerulea_CO1	KT253776
Caribbean_StJ_6_cf.Haliclona.caerulea_CO1	KT253777
Caribbean_StJ_7_cf.Haliclona.caerulea_CO1	KT253778
Caribbean_StJ_8_cf.Haliclona.caerulea_CO1	KT253779
Caribbean_StJ_9_cf.Haliclona.caerulea_CO1	KT253780
Caribbean_StJ_10_cf.Haliclona.caerulea_CO1	KT253781
Caribbean_StJ_11_cf.Haliclona.caerulea_CO1	KT253782
Caribbean_StJ_12_cf.Haliclona.caerulea_CO1	KT253783
Caribbean_St_13_cf.Haliclona.caerulea_CO1	KT253784
Caribbean_St_14_cf.Haliclona.caerulea_CO1	KT253785
Caribbean_St_15_cf.Haliclona.caerulea_CO1	KT253786
Hawaii_AM_1_cf.Haliclona.caerulea_CO1	KT253787
Hawaii_AM_2_cf.Haliclona.caerulea_CO1	KT253788
Hawaii_AM_3_cf.Haliclona.caerulea_CO1	KT253789
Hawaii_AM_4_cf.Haliclona.caerulea_CO1	KT253790
Hawaii_AM_5_cf.Haliclona.caerulea_CO1	KT253791
Hawaii_AM_6_cf.Haliclona.caerulea_CO1	KT253792
Hawaii_AM_7_cf.Haliclona.caerulea_CO1	KT253793
Hawaii_Kan_8_cf.Haliclona.caerulea_CO1	KT253794
Hawaii_Kan_9_cf.Haliclona.caerulea_CO1	KT253795
Hawaii_Kan_10_cf.Haliclona.caerulea_CO1	KT253796
Hawaii_Kan_11_cf.Haliclona.caerulea_CO1	KT253797
Hawaii_Kan_12_cf.Haliclona.caerulea_CO1	KT253798
Hawaii_Kan_13_cf.Haliclona.caerulea_CO1	KT253799
Hawaii_Kan_14_cf.Haliclona.caerulea_CO1	KT253800
Hawaii_Kan_15_cf.Haliclona.caerulea_CO1	KT253801
Hawaii_Kan_16_cf.Haliclona.caerulea_CO1	KT253802
Hawaii_Kan_17_cf.Haliclona.caerulea_CO1	KT253803
Hawaii_Kan_18_cf.Haliclona.caerulea_CO1	KT253804
Hawaii_Kan_19_cf.Haliclona.caerulea_CO1	KT253805
Hawaii_Kan_20_cf.Haliclona.caerulea_CO1	KT253806
Hawaii_Ke_21_cf.Haliclona.caerulea_CO1	KT253807
Hawaii_Ke_22_cf.Haliclona.caerulea_CO1	KT253808
Hawaii_Ke_23_cf.Haliclona.caerulea_CO1	KT253809
Hawaii_Ke_24_cf.Haliclona.caerulea_CO1	KT253810
Hawaii_Ke_25_cf.Haliclona.caerulea_CO1	KT253811
Hawaii_Ke_26_cf.Haliclona.caerulea_CO1	KT253812
Palmyra_Atoll_1_cf.Haliclona.caerulea_CO1	KT253813
Palmyra_Atoll_2_cf.Haliclona.caerulea_CO1	KT253814
Palmyra_Atoll_3_cf.Haliclona.caerulea_CO1	KT253815
Palmyra_Atoll_4_cf.Haliclona.caerulea_CO1	KT253816
Palmyra_Atoll_5_cf.Haliclona.caerulea_CO1	KT253817
Palmyra_Atoll_6_cf.Haliclona.caerulea_CO1	KT253818
Palmyra_Atoll_7_cf.Haliclona.caerulea_CO1	KT253819
Palmyra_Atoll_8_cf.Haliclona.caerulea_CO1	KT253820
Palmyra_Atoll_9_cf.Haliclona.caerulea_CO1	KT253821
Palmyra_Atoll_10_cf.Haliclona.caerulea_CO1	KT253822
Palmyra_Atoll_11_cf.Haliclona.caerulea_CO1	KT253823
Palmyra_Atoll_12_cf.Haliclona.caerulea_CO1	KT253824
Palmyra_Atoll_13_cf.Haliclona.caerulea_CO1	KT253825
Palmyra_Atoll_14_cf.Haliclona.caerulea_CO1	KT253826
Palmyra_Atoll_15_cf.Haliclona.caerulea_CO1	KT253827
Caribbean_PR_1_cf.Haliclona.caerulea_CO1ext.	KT253828
Caribbean_PR_2_cf.Haliclona.caerulea_CO1ext.	KT253829
Caribbean_PR_3_cf.Haliclona.caerulea_CO1ext.	KT253830
Caribbean_PR_4_cf.Haliclona.caerulea_CO1ext.	KT253831
Caribbean_PR_5_cf.Haliclona.caerulea_CO1ext.	KT253832
Caribbean_StJ_6_cf.Haliclona.caerulea_CO1ext.	KT253833
Caribbean_StJ_7_cf.Haliclona.caerulea_CO1ext.	KT253834
Caribbean_StJ_8_cf.Haliclona.caerulea_CO1ext.	KT253835
Caribbean_StJ_9_cf.Haliclona.caerulea_CO1ext.	KT253836
Caribbean_StJ_10_cf.Haliclona.caerulea_CO1ext.	KT253837
Caribbean_StJ_11_cf.Haliclona.caerulea_CO1ext.	KT253838
Caribbean_StJ_12_cf.Haliclona.caerulea_CO1ext.	KT253839
Caribbean_St_13_cf.Haliclona.caerulea_CO1ext.	KT253840
Caribbean_St_14_cf.Haliclona.caerulea_CO1ext.	KT253841
Caribbean_St_15_cf.Haliclona.caerulea_CO1ext.	KT253842
Hawaii_AM_1_cf.Haliclona.caerulea_CO1ext.	KT253843
Hawaii_AM_2_cf.Haliclona.caerulea_CO1ext.	KT253844
Hawaii_AM_3_cf.Haliclona.caerulea_CO1ext.	KT253845
Hawaii_AM_4_cf.Haliclona.caerulea_CO1ext.	KT253846
Hawaii_AM_5_cf.Haliclona.caerulea_CO1ext.	KT253847
Hawaii_AM_6_cf.Haliclona.caerulea_CO1ext.	KT253848
Hawaii_AM_7_cf.Haliclona.caerulea_CO1ext.	KT253849
Hawaii_Kan_8_cf.Haliclona.caerulea_CO1ext.	KT253850
Hawaii_Kan_9_cf.Haliclona.caerulea_CO1ext.	KT253851
Hawaii_Kan_10_cf.Haliclona.caerulea_CO1ext.	KT253852
Hawaii_Kan_11_cf.Haliclona.caerulea_CO1ext.	KT253853
Hawaii_Kan_12_cf.Haliclona.caerulea_CO1ext.	KT253854
Hawaii_Kan_13_cf.Haliclona.caerulea_CO1ext.	KT253855
Hawaii_Kan_14_cf.Haliclona.caerulea_CO1ext.	KT253856
Hawaii_Kan_15_cf.Haliclona.caerulea_CO1ext.	KT253857
Hawaii_Kan_16_cf.Haliclona.caerulea_CO1ext.	KT253858
Hawaii_Kan_17_cf.Haliclona.caerulea_CO1ext.	KT253859
Hawaii_Kan_18_cf.Haliclona.caerulea_CO1ext.	KT253860
Hawaii_Kan_19_cf.Haliclona.caerulea_CO1ext.	KT253861
Hawaii_Kan_20_cf.Haliclona.caerulea_CO1ext.	KT253862
Hawaii_Ke_21_cf.Haliclona.caerulea_CO1ext.	KT253863
Hawaii_Ke_22_cf.Haliclona.caerulea_CO1ext.	KT253864
Hawaii_Ke_23_cf.Haliclona.caerulea_CO1ext.	KT253865
Hawaii_Ke_24_cf.Haliclona.caerulea_CO1ext.	KT253866
Hawaii_Ke_25_cf.Haliclona.caerulea_CO1ext.	KT253867
Hawaii_Ke_26_cf.Haliclona.caerulea_CO1ext.	KT253868
Palmyra_1_cf.Haliclona.caerulea_CO1ext.	KT253869
Palmyra_2_cf.Haliclona.caerulea_CO1ext.	KT253870
Palmyra_3_cf.Haliclona.caerulea_CO1ext.	KT253871
Palmyra_4_cf.Haliclona.caerulea_CO1ext.	KT253872
Palmyra_5_cf.Haliclona.caerulea_CO1ext.	KT253873
Palmyra_6_cf.Haliclona.caerulea_CO1ext.	KT253874
Palmyra_7_cf.Haliclona.caerulea_CO1ext.	KT253875
Palmyra_8_cf.Haliclona.caerulea_CO1ext.	KT253876
Palmyra_9_cf.Haliclona.caerulea_CO1ext.	KT253877
Palmyra_10_cf.Haliclona.caerulea_CO1ext.	KT253878
Palmyra_11_cf.Haliclona.caerulea_CO1ext.	KT253879
Palmyra_12_cf.Haliclona.caerulea_CO1ext.	KT253880
Palmyra_13_cf.Haliclona.caerulea_CO1ext.	KT253881
Palmyra_14_cf.Haliclona.caerulea_CO1ext.	KT253882
Palmyra_15_cf.Haliclona.caerulea_CO1ext.	KT253883
Caribbean_PR_1_cf.Haliclona.caerulea_rnl	KT253716
Caribbean_PR_2_cf.Haliclona.caerulea_rnl	KT253717
Caribbean_PR_3_cf.Haliclona.caerulea_rnl	KT253718
Caribbean_PR_4_cf.Haliclona.caerulea_rnl	KT253719
Caribbean_PR_5_cf.Haliclona.caerulea_rnl	KT253720
Caribbean_StJ_6_cf.Haliclona.caerulea_rnl	KT253721
Caribbean_StJ_7_cf.Haliclona.caerulea_rnl	KT253722
Caribbean_StJ_8_cf.Haliclona.caerulea_rnl	KT253723
Caribbean_StJ_9_cf.Haliclona.caerulea_rnl	KT253724
Caribbean_StJ_10_cf.Haliclona.caerulea_rnl	KT253725
Caribbean_StJ_11_cf.Haliclona.caerulea_rnl	KT253726
Caribbean_StJ_12_cf.Haliclona.caerulea_rnl	KT253727
Caribbean_St_13_cf.Haliclona.caerulea_rnl	KT253728
Caribbean_St_14_cf.Haliclona.caerulea_rnl	KT253729
Caribbean_St_15_cf.Haliclona.caerulea_rnl	KT253730
Hawaii_AM_1_cf.Haliclona.caerulea_rnl	KT253731
Hawaii_AM_2_cf.Haliclona.caerulea_rnl	KT253732
Hawaii_AM_3_cf.Haliclona.caerulea_rnl	KT253733
Hawaii_AM_4_cf.Haliclona.caerulea_rnl	KT253734
Hawaii_AM_5_cf.Haliclona.caerulea_rnl	KT253735
Hawaii_AM_6_cf.Haliclona.caerulea_rnl	KT253736
Hawaii_AM_7_cf.Haliclona.caerulea_rnl	KT253737
Hawaii_Kan_8_cf.Haliclona.caerulea_rnl	KT253738
Hawaii_Kan_9_cf.Haliclona.caerulea_rnl	KT253739
Hawaii_Kan_10_cf.Haliclona.caerulea_rnl	KT253740
Hawaii_Kan_11_cf.Haliclona.caerulea_rnl	KT253741
Hawaii_Kan_12_cf.Haliclona.caerulea_rnl	KT253742
Hawaii_Kan_13_cf.Haliclona.caerulea_rnl	KT253743
Hawaii_Kan_14_cf.Haliclona.caerulea_rnl	KT253744
Hawaii_Kan_15_cf.Haliclona.caerulea_rnl	KT253745
Hawaii_Kan_16_cf.Haliclona.caerulea_rnl	KT253746
Hawaii_Kan_17_cf.Haliclona.caerulea_rnl	KT253747
Hawaii_Kan_18_cf.Haliclona.caerulea_rnl	KT253748
Hawaii_Kan_19_cf.Haliclona.caerulea_rnl	KT253749
Hawaii_Kan_20_cf.Haliclona.caerulea_rnl	KT253750
Hawaii_Ke_21_cf.Haliclona.caerulea_rnl	KT253751
Hawaii_Ke_22_cf.Haliclona.caerulea_rnl	KT253752
Hawaii_Ke_23_cf.Haliclona.caerulea_rnl	KT253753
Hawaii_Ke_24_cf.Haliclona.caerulea_rnl	KT253754
Hawaii_Ke_25_cf.Haliclona.caerulea_rnl	KT253755
Hawaii_Ke_26_cf.Haliclona.caerulea_rnl	KT253756
Palmyra_1_cf.Haliclona.caerulea_rnl	KT253757
Palmyra_2_cf.Haliclona.caerulea_rnl	KT253758
Palmyra_3_cf.Haliclona.caerulea_rnl	KT253759
Palmyra_4_cf.Haliclona.caerulea_rnl	KT253760
Palmyra_5_cf.Haliclona.caerulea_rnl	KT253761
Palmyra_6_cf.Haliclona.caerulea_rnl	KT253762
Palmyra_7_cf.Haliclona.caerulea_rnl	KT253763
Palmyra_8_cf.Haliclona.caerulea_rnl	KT253764
Palmyra_9_cf.Haliclona.caerulea_rnl	KT253765
Palmyra_10_cf.Haliclona.caerulea_rnl	KT253766
Palmyra_11_cf.Haliclona.caerulea_rnl	KT253767
Palmyra_12_cf.Haliclona.caerulea_rnl	KT253768
Palmyra_13_cf.Haliclona.caerulea_rnl	KT253769
Palmyra_14_cf.Haliclona.caerulea_rnl	KT253770
Palmyra_15_cf.Haliclona.caerulea_rnl	KT253771
Caribbean_PR_1_cf.Haliclona.caerulea_18s	KT253660
Caribbean_PR_2_cf.Haliclona.caerulea_18s	KT253661
Caribbean_PR_3_cf.Haliclona.caerulea_18s	KT253662
Caribbean_PR_4_cf.Haliclona.caerulea_18s	KT253663
Caribbean_PR_5_cf.Haliclona.caerulea_18s	KT253664
Caribbean_StJ_6_cf.Haliclona.caerulea_18s	KT253665
Caribbean_StJ_7_cf.Haliclona.caerulea_18s	KT253666
Caribbean_StJ_8_cf.Haliclona.caerulea_18s	KT253667
Caribbean_StJ_9_cf.Haliclona.caerulea_18s	KT253668
Caribbean_StJ_10_cf.Haliclona.caerulea_18s	KT253669
Caribbean_StJ_11_cf.Haliclona.caerulea_18s	KT253670
Caribbean_StJ_12_cf.Haliclona.caerulea_18s	KT253671
Caribbean_St_13_cf.Haliclona.caerulea_18s	KT253672
Caribbean_St_14_cf.Haliclona.caerulea_18s	KT253673
Caribbean_St_15_cf.Haliclona.caerulea_18s	KT253674
Hawaii_AM_1_cf.Haliclona.caerulea_18s	KT253675
Hawaii_AM_2_cf.Haliclona.caerulea_18s	KT253676
Hawaii_AM_3_cf.Haliclona.caerulea_18s	KT253677
Hawaii_AM_4_cf.Haliclona.caerulea_18s	KT253678
Hawaii_AM_5_cf.Haliclona.caerulea_18s	KT253679
Hawaii_AM_6_cf.Haliclona.caerulea_18s	KT253680
Hawaii_AM_7_cf.Haliclona.caerulea_18s	KT253681
Hawaii_Kan_8_cf.Haliclona.caerulea_18s	KT253682
Hawaii_Kan_9_cf.Haliclona.caerulea_18s	KT253683
Hawaii_Kan_10_cf.Haliclona.caerulea_18s	KT253684
Hawaii_Kan_11_cf.Haliclona.caerulea_18s	KT253685
Hawaii_Kan_12_cf.Haliclona.caerulea_18s	KT253686
Hawaii_Kan_13_cf.Haliclona.caerulea_18s	KT253687
Hawaii_Kan_14_cf.Haliclona.caerulea_18s	KT253688
Hawaii_Kan_15_cf.Haliclona.caerulea_18s	KT253689
Hawaii_Kan_16_cf.Haliclona.caerulea_18s	KT253690
Hawaii_Kan_17_cf.Haliclona.caerulea_18s	KT253691
Hawaii_Kan_18_cf.Haliclona.caerulea_18s	KT253692
Hawaii_Kan_19_cf.Haliclona.caerulea_18s	KT253693
Hawaii_Kan_20_cf.Haliclona.caerulea_18s	KT253694
Hawaii_Ke_21_cf.Haliclona.caerulea_18s	KT253695
Hawaii_Ke_22_cf.Haliclona.caerulea_18s	KT253696
Hawaii_Ke_23_cf.Haliclona.caerulea_18s	KT253697
Hawaii_Ke_24_cf.Haliclona.caerulea_18s	KT253698
Hawaii_Ke_25_cf.Haliclona.caerulea_18s	KT253699
Hawaii_Ke_26_cf.Haliclona.caerulea_18s	KT253700
Palmyra_1_cf.Haliclona.caerulea_18s	KT253701
Palmyra_2_cf.Haliclona.caerulea_18s	KT253702
Palmyra_3_cf.Haliclona.caerulea_18s	KT253703
Palmyra_4_cf.Haliclona.caerulea_18s	KT253704
Palmyra_5_cf.Haliclona.caerulea_18s	KT253705
Palmyra_6_cf.Haliclona.caerulea_18s	KT253706
Palmyra_7_cf.Haliclona.caerulea_18s	KT253707
Palmyra_8_cf.Haliclona.caerulea_18s	KT253708
Palmyra_9_cf.Haliclona.caerulea_18s	KT253709
Palmyra_10_cf.Haliclona.caerulea_18s	KT253710
Palmyra_11_cf.Haliclona.caerulea_18s	KT253711
Palmyra_12_cf.Haliclona.caerulea_18s	KT253712
Palmyra_13_cf.Haliclona.caerulea_18s	KT253713
Palmyra_14_cf.Haliclona.caerulea_18s	KT253714
Palmyra_15_cf.Haliclona.caerulea_18s	KT253715
