# Supplementary material for: Cryptic species obscure introduction pathway of the blue Caribbean sponge (Haliclona (Soestella) caerulea), (order: Haplosclerida) to Palmyra Atoll, Central Pacific
Source: PeerJ. 2015 Aug 6;3:e1170. doi: 10.7717/peerj.1170 (PMC4558080; doi:10.7717/peerj.1170)
Supplement: Appendix S4 — Appendix 4 Oxea lengths (µm) (30 per sample), mean and standard error (SE), minimum (Min) and maximum (Max) measurements of the 56 sequenced ‘Haliclona (Soestella) caerulea’ samples from sites: Palmyra Atoll (PA), Ala Moana (AM), Kāneʻohe Bay (Kan), Keʻehi harbor (Ke), Puerto Rico (PR), St John Island (StJ) and St Thomas Island (StT). [file peerj-03-1170-s004.xlsx]

## Sheet: Appendix 2
Appendix 2 Oxea lengths (µm) (30 per sample), mean and standard error (SE), minimum (Min) and maximum (Max) measurements of the 56 sequenced ‘Haliclona (Soestella) caerulea’ samples from sites: Palmyra Atoll (PA), Ala Moana (AM), Kāneʻohe Bay (Kan), Keʻehi harbor (Ke), Puerto Rico (PR), St John Island (StJ) and St Thomas Island (StT).
Location	Site Code	1	2	3	4	5	6	7	8	9	10	11	12	13	14	15	16	17	18	19	20	21	22	23	24	25	26	27	28	29	30	Mean and SE	Min	Max
Palmyra Atoll	PA_1	62.428	52.144	61.225	63.333	67.027	68.081	64.71	66.126	67.465	59.072	66.727	67.74	67.816	67.458	62.841	63.847	59.118	76.035	65.775	65.941	72.316	66.471	59.585	75.42	66.788	66.783	68.061	66.866	64.74	64.799	65.6 ± 0.9	52.144	76.035
Palmyra Atoll	PA_2	50.959	53.607	53.147	52.669	51.16	51.71	51.53	52.714	52.845	59.652	54.775	51.342	54.919	53.964	50.271	52.114	45.292	52.364	54.919	49.113	49.125	46.494	44.871	48.161	54.778	49.049	53.769	50.706	52.125	48.211	51.5 ± 0.6	44.871	59.652
Palmyra Atoll	PA_3	70.05	72.579	65.562	70.217	62.613	64.794	64.82	63.607	68.482	71.131	66.097	65.046	66.133	65.046	67.851	68.874	67.23	60.576	70.753	61.371	69.645	64.796	64.218	60.823	73.413	71.919	69.875	68.198	61.604	70.142	66.9 ± 0.7	60.576	73.413
Palmyra Atoll	PA_4	75.956	76.313	64.176	70.503	75.458	78.671	71.477	77.772	75.628	81.048	74.843	69.612	68.957	78.311	81.09	80.396	81.055	79.631	72.542	73.029	76.509	75.89	76.296	79.211	61.009	80.756	78.74	77.819	81.172	83.238	75.9 ± 0.9	61.009	83.238
Palmyra Atoll	PA_5	58.665	71.162	51.397	49.694	65.602	57.52	53.998	59.712	57.857	52.072	66.929	45.285	50.14	68.637	53.653	66.863	73.876	65.974	62.57	68.459	56.758	61.914	72.951	68.665	63.135	61.208	59.644	60.897	52.345	66.251	60.8 ± 1.4	45.285	73.876
Palmyra Atoll	PA_6	76.824	69.207	47.041	72.474	72.637	70.688	72.786	75.435	74.367	74.003	71.063	72.85	59.063	63.019	69.79	67.358	74.459	70.881	76.615	65.328	47.925	73.997	68.34	77.108	74.288	67.48	65.286	71.566	79.876	73.72	69.8 ± 1.4	47.041	79.876
Palmyra Atoll	PA_7	67.02	71.393	78.786	67.417	78.909	69.542	62.109	57.315	64.292	67.176	74.011	73.783	74.305	69.151	52.265	75.065	69.568	74.16	70.103	67.151	75.025	70.946	69.348	68.755	62.012	59.585	69.92	71.604	60.538	72.579	68.8 ± 1.1	52.265	78.909
Palmyra Atoll	PA_8	71.413	78.38	77.935	82.918	52.482	70.939	76.724	73.111	66.932	74.391	76.48	61.633	54.875	55.878	77.265	70.565	72.097	68.602	76.099	70.803	65.443	68.654	71.532	70.53	71.743	75.146	66.471	69.935	55.927	72.579	69.9 ± 1.4	52.482	82.918
Palmyra Atoll	PA_9	70.27	69.925	68.782	69.129	70.336	68.615	73.914	57.991	67.824	68.343	70.113	65.798	66.897	67.218	61.845	65.325	73.483	65.552	70.681	58.987	71.857	60.296	70.89	67.109	58.108	65.046	62.787	72.408	65.151	72.711	67.2 ± 0.8	57.991	73.914
Palmyra Atoll	PA_10	63.56	67.03	66.665	71.313	71.3	64.834	61.369	67.75	62.155	70.645	69.02	59.408	70.562	66.631	67.017	71.612	60.298	62.588	69.968	67.066	61.898	66.515	68.677	62.785	69.012	70.113	67.789	66.022	67.066	67.125	66.6 ± 0.6	59.408	71.612
Palmyra Atoll	PA_11	59.389	64.719	71.74	46.571	68.5	67.499	60.679	67.253	46.779	64.087	56.802	63.513	68.185	67.358	70.249	65.44	70.494	60.842	71.209	68.558	62.842	56.753	70.725	63.506	70.249	69.156	55.838	66.03	63.153	68.602	64.2 ± 1.2	46.571	71.74
Palmyra Atoll	PA_12	60.038	63.66	69.254	62.834	65.054	60.496	56.424	60.971	63.772	66.261	53.162	56.148	62.768	67.074	67.193	63.726	62.741	64.88	61.02	64.147	71.152	68.132	55.832	71.218	71.406	73.065	60.817	66.593	71.978	62.654	64.1 ± 0.9	53.162	73.065
Palmyra Atoll	PA_13	74.486	67.735	69.124	63.33	66.807	75.534	67.962	75.396	75.091	68.927	70.754	67.306	76.87	76.138	68.294	74.206	67.055	63.135	59.96	73.261	70.965	68.274	60.046	80.303	70.883	78.443	72.452	71.46	70.187	63.001	70.2 ± 1.0	59.96	80.303
Palmyra Atoll	PA_14	70.161	57.238	52.077	54.928	63.608	58.88	66.615	71.329	70.888	64.745	67.915	60.855	62.792	56.696	61.579	61.48	57.833	78.731	68.365	64.463	62.269	72.391	60.467	73.392	66.017	75.918	63.958	69.083	60.08	73.321	64.9 ± 1.2	52.077	78.731
Palmyra Atoll	PA_15	75.92	69.534	73.108	77.588	70.478	75.193	71.946	75.42	74.258	78.909	77.325	77.518	70.618	80.888	79.875	77.198	77.068	71.62	80.282	73.523	71.15	75.896	77.408	82.174	76.629	65.505	73.289	77.033	76.117	72.236	75.2 ± 0.7	65.505	82.174
Hawaiʻi	AM_1	54.141	60.704	57.062	61.747	50.73	62.487	54.04	61.671	60.433	62.354	58.894	55.411	54.534	55.797	52.272	59.638	56.934	58.427	54.08	60.37	65.223	56.774	53.514	54.676	55.807	56.56	59.387	59.902	67.479	54.467	57.9 ± 0.7	50.73	67.479
Hawaiʻi	AM_2	59.822	66.021	65.836	61.765	58.826	57.696	61.878	59.631	60.414	59.393	62.027	63.319	57.044	63.254	57.132	55.903	59.32	58.394	52.259	58.323	58.748	52.713	57.347	59.703	58.651	59.195	60.044	62.758	59.012	62.655	59.6 ± 0.6	52.259	66.021
Hawaiʻi	AM_3	54.977	59.77	62.858	58.405	63.565	55.522	59.822	57.124	62.669	57.142	64.576	61.848	61.649	56.643	58.826	60.884	56.842	60.251	56.208	58.738	63.319	62.233	65.912	61.03	63.048	58.528	65.286	60.118	65.495	64.309	60.6 ± 0.6	54.977	65.912
Hawaiʻi	AM_4	59.907	62.972	58.655	57.759	53.972	67.362	58.591	56.753	65.207	66.243	64.178	66.896	51.024	55.897	59.231	56.763	62.552	57.799	61.553	64.158	61.782	59.208	66.883	63.427	56.964	64.513	63.739	52.845	53.399	62.26	60.4 ± 0.8	51.024	67.362
Hawaiʻi	AM_5	56.765	58.704	57.089	62.122	59.752	58.11	60.56	55.59	58.454	59.378	57.533	58.962	54.66	55.868	54.099	56.095	58.59	59.281	61.651	61.308	62.162	64.512	63.413	50.501	63.544	61.505	60.434	60.739	58.704	57.99	58.9 ± 0.6	50.501	64.512
Hawaiʻi	AM_6	66.431	57.329	60.308	57.799	56.22	62.589	56.763	60.583	55.641	58.544	62.507	57.649	65.461	56.886	62.089	57.759	60.658	62.874	57.909	59.272	57.363	62.676	61.752	55.141	62.174	61.347	61.728	68.34	60.824	62.501	60.3 ± 0.6	55.141	68.34
Hawaiʻi	AM_7	59.657	59.305	59.747	56.643	60.264	55.576	61.136	56.886	57.633	63.155	52.224	56.818	55.75	61.328	57.458	58.55	56.522	62.671	59.479	59.102	59.077	56.263	56.013	58.655	62.791	58.394	68.098	55.308	60.37	62.994	58.9 ± 0.6	52.224	68.098
Hawaiʻi	Kan_8	103.289	91.179	102.37	110.084	113.48	97.893	109.855	93.77	108.092	97.94	103.856	98.273	83.965	98.784	101.103	99.207	107.267	92.546	112.142	110.857	103.761	88.754	114.5	100.167	102.219	97.443	107.266	105.88	108.62	106.031	102.4 ± 1.4	83.965	114.5
Hawaiʻi	Kan_9	113.694	104.346	125.378	113.913	103.785	112.144	116.926	111.931	118.524	110.429	127.476	120.049	107.727	119.777	109.929	113.559	122.259	117.861	125.329	114.871	122.028	124.642	104.468	104.323	123.425	118.06	90.551	108.122	123.541	115.979	114.8 ± 1.5	90.551	127.476
Hawaiʻi	Kan_10	102.846	105.01	110.102	116.91	100.359	98.281	104.988	111.399	97.016	101.88	107.933	104.398	107.842	109.044	102.952	105.124	99.72	101.489	106.584	105.141	109.776	102.518	108.304	105.201	108.699	98.864	102.896	92.371	109.754	111.561	105 ± 0.9	92.371	116.91
Hawaiʻi	Kan_11	61.384	56.752	57.478	60.896	58.641	57.29	58.695	60.116	60.005	54.609	56.7	56.514	60.012	61.579	58.296	63.519	59.995	56.645	58.179	59.331	56.065	55.949	57.529	61.5	95.343	58.694	63.535	53.674	62.284	56.079	59.9 ± 1.3	53.674	95.343
Hawaiʻi	Kan_12	117.387	113.362	104.984	106.06	110.344	114.674	106.193	114.534	108.146	109.693	114.393	113.444	112.635	105.274	105.968	115.584	121.524	114.275	110.605	113.353	114.059	113.106	115.296	110.694	114.923	101.734	109.488	107.125	116.408	120.673	111.9 ± 0.9	101.734	121.524
Hawaiʻi	Kan_13	88.941	95.682	103.482	97.666	92.752	108.112	90.881	102.065	81.982	89.833	99.283	96.885	88.243	90.586	92.722	98.84	96.071	90.668	101.215	104.393	102.633	95.414	91.192	88.571	98.613	95.48	93.383	93.751	90.214	101.575	95.4 ± 1.1	81.982	108.112
Hawaiʻi	Kan_14	58.964	55.018	55.472	51.031	54.447	50.971	52.579	57.315	55.073	57.767	55.851	54.561	58.703	61.786	55.525	56.331	61.778	57.156	59.493	55.164	56.071	53.758	53.765	54.786	52.01	55.625	56.879	56.37	60.951	55.339	56 ± 0.5	50.971	61.786
Hawaiʻi	Kan_15	60.664	55.133	55.719	58.826	57.411	56.425	59.938	61.136	57.138	64.028	56.011	55.421	56.886	57.666	56.196	53.023	62.758	55.649	56.844	55.903	55.584	60.664	52.961	59.749	59.548	55.391	61.201	59.778	59.443	64.957	58.1 ± 0.5	52.961	64.957
Hawaiʻi	Kan_16	96.547	97.203	98.76	96.807	102.643	102.231	99.672	96.973	94.377	95.732	85.756	98.492	96.306	94.712	97.573	87.768	100.047	100.386	100.496	94.585	98.591	94.669	97.628	79.492	93.289	102.423	102.583	92.936	91.137	95.599	96.2 ± 0.9	79.492	102.643
Hawaiʻi	Kan_17	110.054	99.22	106.279	107.287	102.454	99.72	107.425	116.3	112.121	110.249	121.031	111.692	110.448	107.796	105.783	102.652	105.325	116.708	111.797	104.083	102.592	112.37	96.37	111.995	107.266	102.313	101.528	109.491	103.267	106.03	107.4 ± 1.0	96.37	121.031
Hawaiʻi	Kan_18	105.067	110.266	115.219	91.568	103.142	105.475	90.573	99.417	103.944	113.352	112.911	99.17	111.194	105.805	103.925	99.311	113.3	100.937	107.717	109.419	105.86	100.778	97.368	107.611	116.277	104.941	101.989	107.363	110.392	109.374	105.5 ± 1.2	90.573	116.277
Hawaiʻi	Kan_19	107.701	111.934	114.273	105.404	103.963	104.876	106.781	109.656	106.224	100.287	107.608	110.131	102.314	101.507	110.084	112.818	95.91	107.624	111.21	115.386	109.273	107.33	113.15	101.772	92.937	109.788	103.979	110.42	114.324	105.536	107.1 ± 1.0	92.937	115.386
Hawaiʻi	Kan_20	119.386	113.853	104.719	107.531	110.756	114.269	90.934	108.938	100.82	106.93	100.205	108.038	108.444	106.978	106.959	92.658	97.76	103.461	113.79	117.099	105.123	101.373	113.527	106.696	115.243	103.681	106.919	120.089	108.933	106.845	107.4 ± 1.3	90.934	120.089
Hawaiʻi	Ke_21	246.4	257.7	261.9	243.9	250.8	259.8	266.8	253.731	250.571	222.955	259.17	190.996	245.338	219.894	263.535	231.664	215.983	261.129	227.547	245.353	245.779	247.778	237.534	273.239	231.371	252.258	264.358	284.021	276.48	254.254	248.1 ± 3.6	190.996	284.021
Hawaiʻi	Ke_22	200.285	213.782	234.13	168.836	219.154	209.517	220.859	225.738	261.222	213.51	227.157	209.369	214.29	221.34	249.178	224.803	220.693	274.959	226.345	239.13	205.524	174.514	265.001	220.707	227.463	223.474	198.823	225.501	212.649	212.982	221.4 ± 4.1	168.836	274.959
Hawaiʻi	Ke_23	219.267	196.457	215.045	211.025	230.356	237.382	175.35	235.986	207.921	224.529	211.616	266.23	231.588	199.06	201.67	233.857	174.576	219.688	249.82	236.181	233.791	203.24	244.529	190.542	227.233	209.9	238.91	229.201	224.803	195.052	219.2 ± 3.9	174.576	266.23
Hawaiʻi	Ke_24	259.1	246.9	258.7	251.9	220.9	236.7	247.4	287.9	290.5	264.9	252.9	269.6	284	254.9	260.7	252.1	251.2	250.7	258.9	248	273.6	235.4	219.4	214.2	251.5	255.2	271.5	280.838	245.3	249.1	254.8 ± 3.4	214.2	290.5
Hawaiʻi	Ke_25	188.424	258.965	254.732	219.128	208.174	285.073	216.033	216.353	216.141	213.74	249.13	243.983	237.421	199.381	205.281	251.445	274.666	155.406	222.388	284.987	240.687	202.787	230.64	240.464	245.585	232.474	211.678	208.126	233.057	235.922	229.4 ± 5.1	155.406	285.073
Hawaiʻi	Ke_26	212.2	215.7	174.3	203.4	208.7	221.5	202.7	189.2	231.5	212.2	210.5	223.3	203.7	216.3	215	187.4	196.5	201.5	203.5	223.3	195.5	190.3	223.9	176.6	225.6	216.5	225.6	231.2	194	189.1	207.4 ± 2.9	174.3	231.5
Caribbean	PR_1	138.134	155.727	135.158	151.034	134.534	151.806	136.226	142.76	136.91	139.582	145.292	148.443	132.644	155.488	146.659	143.52	147.133	140.542	143.325	148.892	138.409	155.368	151.614	137.214	135.319	143.422	136.107	146.5	130.956	146.595	143.2 ± 1.3	130.956	155.727
Caribbean	PR_2	157.895	155.191	151.49	139.319	144.271	158.442	147.11	154.508	140.351	131.579	135.965	140.625	155.563	158.442	147.11	141.239	136.036	128.995	167.874	143.67	136.6	155.748	145.796	145.268	156.18	142.054	149.187	155.067	149.895	136.6	146.9 ± 1.7	128.995	167.874
Caribbean	PR_3	116.459	121.915	126.771	125.667	120.072	131.094	128.59	103.538	117.728	125	130.455	122.523	118.906	125.297	131.306	139.004	123.429	128.156	127.283	124.329	128.156	129.167	133.063	128.156	133.69	131.094	129.669	123.279	134.245	125.667	126.1 ± 1.2	103.538	139.004
Caribbean	PR_4	141.562	152.016	136.903	139.756	144.44	111.27	132.051	134.421	139.341	133.458	141.273	143.068	136.403	162.88	139.304	112.983	144.367	149.541	152.865	139.02	107.445	152.779	151.064	151.898	139.53	153.432	155.746	142.681	152.244	141.496	141.2 ± 2.3	107.445	162.88
Caribbean	PR_5	129.59	115.876	106.082	120.434	109.999	118.502	122.885	115.377	114.372	118.502	133.394	112.421	118.096	121.942	127.872	131.652	112.336	129.07	128.995	118.096	129.07	120.434	118.745	133.61	129.887	124.75	142.797	137.092	138.488	131.652	123.7 ± 1.7	106.082	142.797
Caribbean	StJ_6	159.129	136.452	142.852	126.981	140.883	133.277	149.039	138.954	158.249	131.235	125.135	164.876	133.834	117.776	147.28	140.552	127.493	138.349	138.954	123.638	129.306	164.876	125.803	130.453	137.133	132.471	153.228	139.755	133.834	129.45	138.4 ± 2.2	117.776	164.876
Caribbean	StJ_7	150.979	168.539	147.596	139.937	148.685	135.299	152.826	160.831	140.985	158.06	132.417	140.387	155.78	138.627	168.996	137.357	133.839	174.429	154.287	138.121	152.458	156.409	136.177	143.89	116.527	145.683	149.25	135.713	145.442	145.875	146.8 ± 2.2	116.527	174.429
Caribbean	StJ_8	135.299	146.259	139.937	134.883	146.067	144.571	126.734	150.233	139.334	157.526	130.818	141.779	127.341	127.341	161.223	139.384	135.039	137.357	150.979	144.571	136.332	143.108	146.834	143.108	130.818	145.442	129.363	149.25	136.691	136.126	140.5 ± 1.6	126.734	161.223
Caribbean	StJ_9	149.976	136.993	146.089	148.217	150.993	129.152	135.052	169.02	157.648	189.499	146.885	154.883	172.569	166.578	166.972	175.336	141.969	172.092	132.435	138.151	151.472	144.353	157.228	154.351	134.347	134.836	150.492	164.89	180.878	163.889	153.9 ± 2.9	129.152	189.499
Caribbean	StJ_10	150.228	153.892	126.849	146.2	156.29	147.857	157.354	143.753	146.141	176.63	161.483	130.569	172.342	135.675	160.926	158.49	144.464	133.611	141.565	158.49	158.571	132.616	152.749	135.012	141.565	144.02	143.544	155	168.707	164.681	150 ± 2.3	126.849	176.63
Caribbean	StJ_11	145.839	128.303	133.642	138.303	137.934	145.038	168.639	147.649	125.025	139.011	109.218	141.242	120.088	138.537	126.201	148.815	134.408	144.95	124.527	157.019	137.912	159.023	123.566	117.035	128.814	121.043	153.549	121.009	126.624	138.745	136.1 ± 2.5	109.218	168.639
Caribbean	StJ_12	151.917	163.614	128.919	153.071	143.661	154.65	151.797	147.374	131.16	149.825	180.007	145.007	183.613	154.296	199.093	165.201	156.173	134.451	155.237	188.957	171.05	180.781	192.016	194.934	126.83	124.901	165.532	157.758	126.83	182.319	158.7 ± 3.9	124.901	199.093
Caribbean	StT_13	187.371	185.437	151.286	138.344	188.31	187.27	189.807	182.108	158.595	126.475	173.769	170.232	145.408	175.502	145.431	185.717	189.961	173.207	137.779	176.611	136.068	135.421	145.251	132.678	126.655	177.053	131.322	135.382	166.12	190.182	161.5 ± 4.2	126.475	190.182
Caribbean	StT_14	171.45	164.171	145.844	173.787	144.913	129.055	131.931	151.2	203.404	170.311	164.737	184.066	161.677	167.639	171.975	172.09	151.163	125.352	162.808	180.585	174.322	176.557	169.713	131.695	150.001	151.759	166.897	166.084	146.596	152.926	160.5 ± 3.2	125.352	203.404
Caribbean	StT_15	206.816	110.961	127.379	145.57	128.775	175.108	172.175	162.374	162.727	128.565	141.719	145.199	123.206	151.119	138.736	181.837	208.861	180.028	159.206	150.739	130.285	140.86	132.289	138.542	150.784	145.547	165.093	143.681	134.865	183.664	152.2 ± 4.3	110.961	208.861
